# Supplementary material for: A novel approach to synthesize polymers for potential photodynamic therapy: from benzenedinitrile to phthalocyanine
Source: Royal Society of Chemistry journal article supplement (doi:10.1039/c3py01129a), 2014-01-01
Supplement: c3py01129a1.pdf [file c3py01129a1.pdf]

## Supporting Information

### Novel Approach to Synthesize Polymers for Potential Photodynamic Therapy: from Benzendinitrile to Phthalocyanine

Laibing Wang, Jun Li, Weidong Zhang, Gaojian Chen\*, Wei Zhang\*, Xiulin Zhu

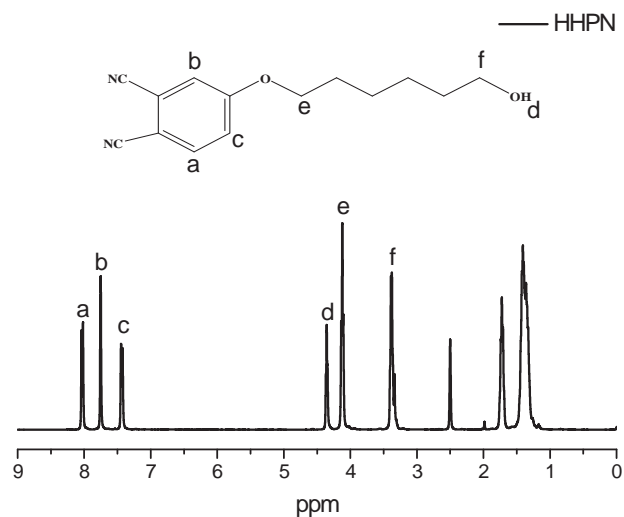

**Fig. S1** <sup>1</sup>H-NMR spectrum of 4-(6-hydroxyhexyloxy) phthalonitrile (HHPN).

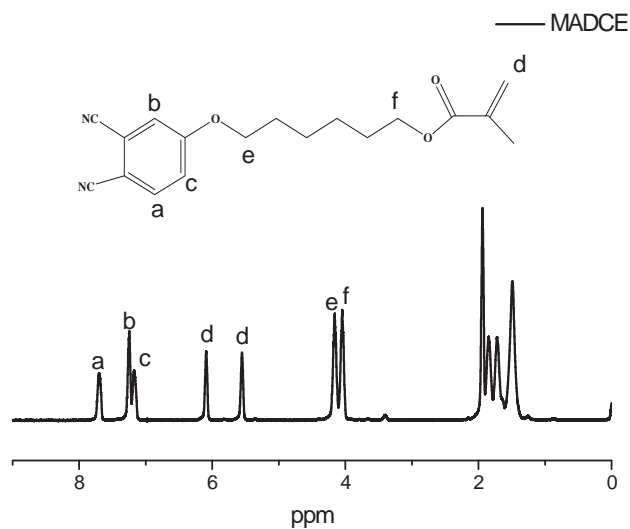

**Fig. S2** <sup>1</sup>H-NMR spectrum of 2-methyl-acrylic acid 6-(3,4-dicyano-phenoxy)-hexyl ester (MADCE).

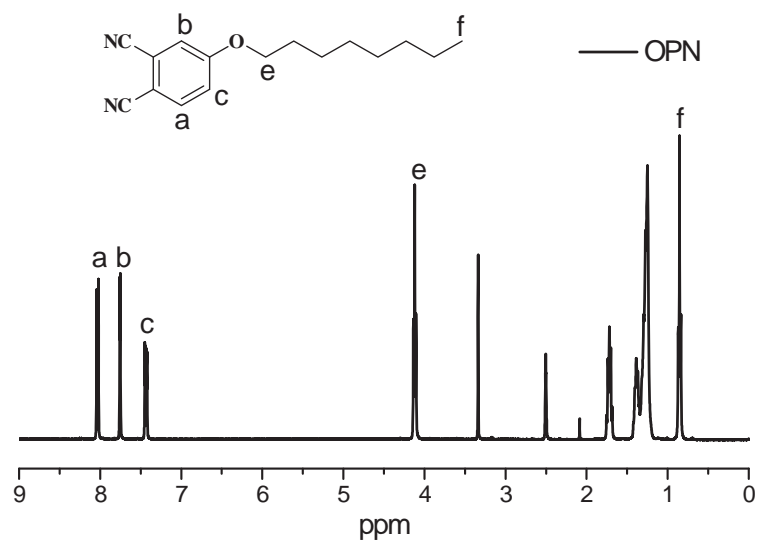

**Fig. S3** <sup>1</sup>H-NMR spectrum of 4-(octyloxy) phthalonitrile (OPN).

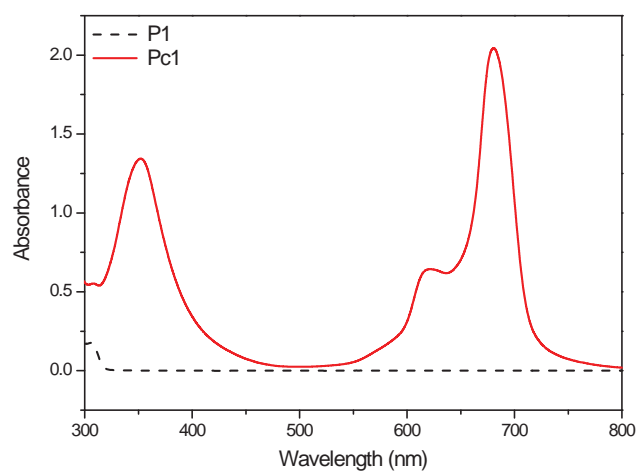

**Fig. S4** UV-Vis spectrum of polymer before (P1) and after modification (Pc1) in DMF.

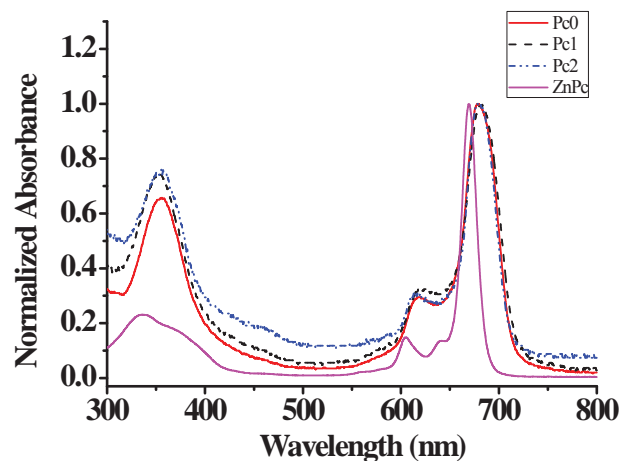

Fig. S5 Comparison of UV-Vis spectra of Pc-containing polymers and ZnPc in DMF.

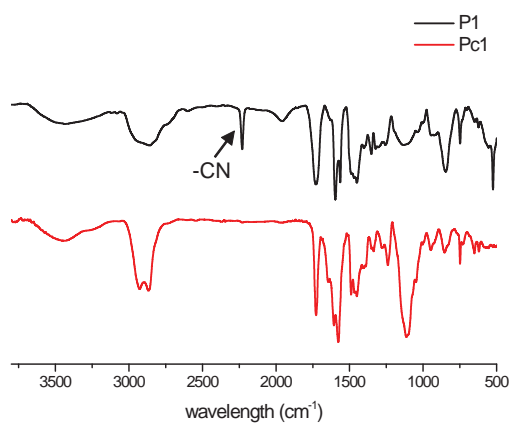

Fig. S6 FT-IR spectra of polymers before (P1) and after modification (Pc1).

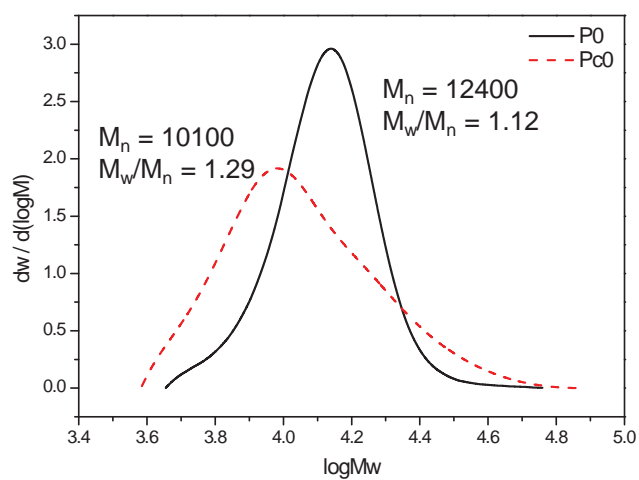

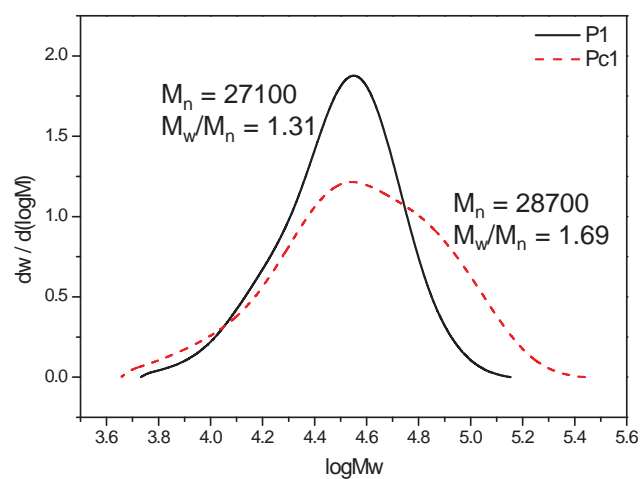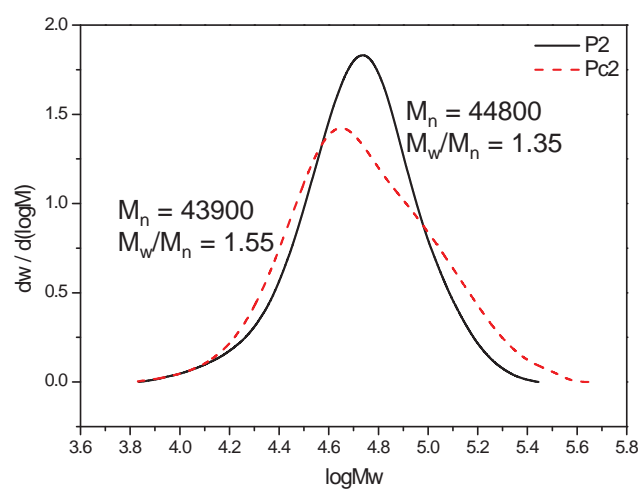

Fig. S7 GPC traces of polymers before and after modification.

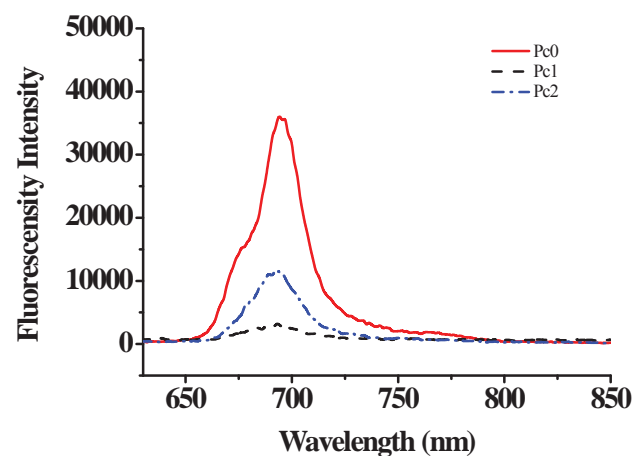

Fig.S8 Fluorescence spectra of polymers in DMF. (0.002mg/mL,  $\lambda_{ex} = 620$  nm)

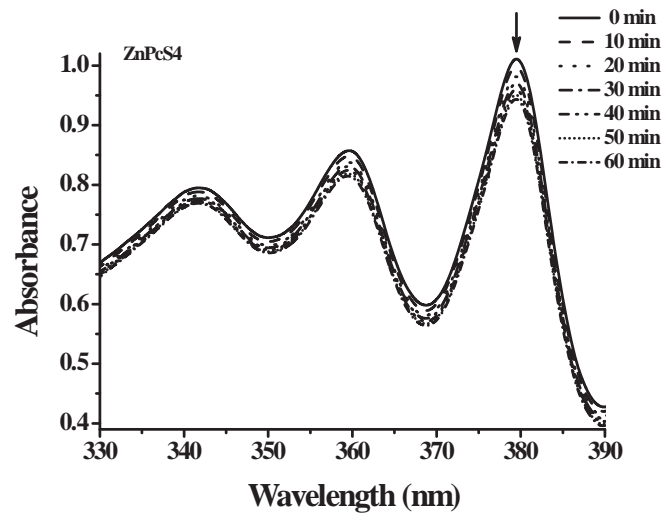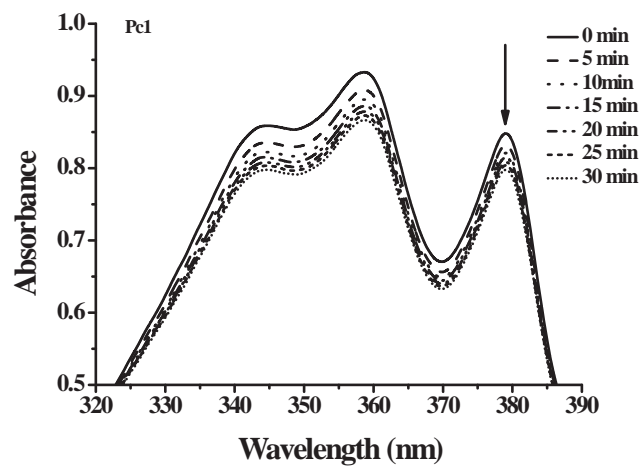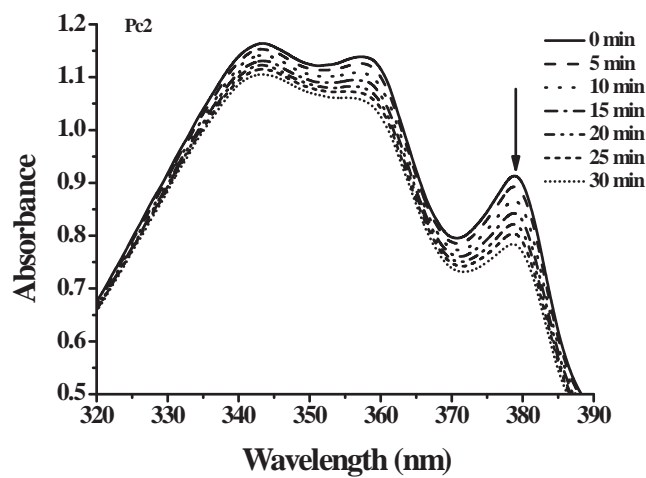

Fig. S9 Absorption spectra for the determination of singlet oxygen quantum yield of Pc1 and Pc2 in aqueous media. (ADMA: 0.027 mg/ml, ZnPcS<sub>4</sub>: 0.016 mg/ml, Pc1: 0.15 mg/ml, Pc2: 0.4 mg/ml)
